# Supplementary material
Source: PubMed Central journal article supplement (PMC6547141)
Supplement: jamainternmed-179-1285-s001.pdf [file jamainternmed-179-1285-s001.pdf]

## Supplementary Online Content

Hart KL, Perlis RH. Trends in proportion of women as authors of medical journal articles, 2008-2018. *JAMA Intern Med*. Published online May 28, 2019.  
doi:10.1001/jamainternmed.2019.0907

**eTable.** Journals and Impact Factors by Department

**eMethods.**

This supplementary material has been provided by the authors to give readers additional information about their work.

**eTable. Journals and Impact Factors by Department**

| Supplemental Table 1: Journals and Impact Factors by Department |                                          |                  |
|-----------------------------------------------------------------|------------------------------------------|------------------|
| Department                                                      | Category                                 | Impact Factor    |
| Anesthesiology                                                  | Br J Anaesth                             | 6.24             |
|                                                                 | Anesthesiology                           | 5.79             |
|                                                                 | Pain                                     | 5.45             |
|                                                                 | Anaesthesia                              | 4.74             |
|                                                                 | J Neurosurg Anesthesiol                  | 4.03             |
|                                                                 | Anesth. Analg.                           | 4.01             |
|                                                                 | Eur J Anaesthesiol                       | 3.57             |
|                                                                 | Reg Anesth Pain Med                      | 3.52             |
|                                                                 | Clin J Pain                              | 3.49             |
|                                                                 | Eur J Pain                               | 3.02             |
|                                                                 | Pain Physician                           | 2.84             |
|                                                                 | Minerva Anesthesiol                      | 2.62             |
|                                                                 | Pain Pract                               | 2.50             |
|                                                                 | Acta Anaesthesiol Scand                  | 2.44             |
|                                                                 | Curr Opin Anaesthesiol                   | 2.37             |
|                                                                 | Cross Specialty                          | N. Engl. J. Med. |
| Lancet                                                          |                                          | 47.83            |
| JAMA                                                            |                                          | 44.41            |
| BMJ                                                             |                                          | 20.79            |
| Dermatology                                                     | J. Am. Acad. Dermatol.                   | 7.00             |
|                                                                 | J. Invest. Dermatol.                     | 6.29             |
|                                                                 | JAMA Dermatol                            | 5.82             |
|                                                                 | Pigment Cell Melanoma Res                | 5.17             |
|                                                                 | Br. J. Dermatol.                         | 4.71             |
|                                                                 | Contact Derm.                            | 4.34             |
|                                                                 | J. Dermatol. Sci.                        | 3.73             |
|                                                                 | Acta Dermatovenerol Alp Pannonica Adriat | 3.65             |
|                                                                 | J Eur Acad Dermatol Venereol             | 3.53             |
|                                                                 | Wound Repair Regen                       | 3.04             |
|                                                                 | J Dtsch Dermatol Ges                     | 2.87             |
|                                                                 | Int Wound J                              | 2.85             |
|                                                                 | Skin Pharmacol Physiol                   | 2.76             |
|                                                                 | Am J Clin Dermatol                       | 2.76             |
| Photodermatol Photoimmunol Photomed                             | 2.66                                     |                  |
| Internal Medicine                                               | Ann. Intern. Med.                        | 17.20            |
|                                                                 | JAMA Intern Med                          | 16.54            |

|                           |                                  |       |
|---------------------------|----------------------------------|-------|
|                           | PLoS Med.                        | 11.86 |
|                           | J Cachexia Sarcopenia Muscle     | 9.70  |
|                           | BMC Med                          | 8.10  |
|                           | J. Intern. Med.                  | 7.98  |
|                           | Mayo Clin. Proc.                 | 6.86  |
|                           | CMAJ                             | 6.78  |
|                           | Nat Rev Dis Primers              | 6.39  |
|                           | Cochrane Database Syst Rev       | 6.26  |
|                           | Am. J. Med.                      | 5.55  |
|                           | Ann Fam Med                      | 4.92  |
|                           | Transl Res                       | 4.65  |
|                           | Dtsch Arztebl Int                | 4.26  |
|                           | Palliat Med                      | 4.22  |
| Neurology                 | Lancet Neurol                    | 26.28 |
|                           | Nat Rev Neurol                   | 20.26 |
|                           | Acta Neuropathol.                | 12.21 |
|                           | Brain                            | 10.29 |
|                           | JAMA Neurol                      | 10.03 |
|                           | Ann. Neurol.                     | 9.89  |
|                           | Alzheimers Dement                | 9.48  |
|                           | Sleep Med Rev                    | 8.96  |
|                           | Neurology                        | 8.32  |
|                           | Neuro-oncology                   | 7.79  |
|                           | Neuroscientist                   | 7.39  |
|                           | J. Neurol. Neurosurg. Psychiatry | 7.349 |
|                           | Mov. Disord.                     | 7.07  |
|                           | Brain Pathol.                    | 6.62  |
|                           | Alzheimers Res Ther              | 6.15  |
| Obstetrics and Gynecology | Hum. Reprod. Update              | 11.75 |
|                           | Am. J. Obstet. Gynecol.          | 5.23  |
|                           | Obstet Gynecol                   | 5.22  |
|                           | BJOG                             | 5.05  |
|                           | Hum. Reprod.                     | 5.02  |
|                           | Gynecol. Oncol.                  | 4.96  |
|                           | Ultrasound Obstet Gynecol        | 4.71  |
|                           | Fertil. Steril.                  | 4.45  |
|                           | Pregnancy Hypertens              | 3.93  |
|                           | Mol. Hum. Reprod.                | 3.59  |
|                           | Maturitas                        | 3.26  |
|                           | Reprod. Biomed. Online           | 3.25  |
|                           | Clin Perinatol                   | 3.233 |

|            |                                      |        |
|------------|--------------------------------------|--------|
|            | Semin. Perinatol.                    | 3.185  |
|            | J Gynecol Oncol                      | 3.14   |
| Oncology   | CA Cancer J Clin                     | 187.04 |
|            | Nat. Rev. Cancer                     | 37.15  |
|            | Lancet Oncol.                        | 33.90  |
|            | Cancer Cell                          | 27.41  |
|            | J. Clin. Oncol.                      | 24.01  |
|            | Nat Rev Clin Oncol                   | 20.69  |
|            | Cancer Discov                        | 20.01  |
|            | JAMA Oncol                           | 16.56  |
|            | J. Natl. Cancer Inst.                | 12.59  |
|            | Ann. Oncol.                          | 11.86  |
|            | Leukemia                             | 11.70  |
|            | Clin. Cancer Res.                    | 9.62   |
|            | Biochim. Biophys. Acta               | 9.45   |
|            | Semin. Cancer Biol.                  | 9.14   |
|            | Cancer Res.                          | 9.12   |
| Pediatrics | JAMA Pediatr                         | 10.25  |
|            | J Am Acad Child Adolesc Psychiatry   | 6.44   |
|            | Pediatrics                           | 5.71   |
|            | Pediatr Diabetes                     | 4.27   |
|            | Arch. Dis. Child. Fetal Neonatal Ed. | 4.10   |
|            | J Adolesc Health                     | 3.97   |
|            | J. Pediatr.                          | 3.87   |
|            | Pediatr Allergy Immunol              | 3.78   |
|            | Pediatr Crit Care Med                | 3.50   |
|            | Pediatr Obes                         | 3.40   |
|            | Semin Fetal Neonatal Med             | 3.33   |
|            | Eur Child Adolesc Psychiatry         | 3.30   |
|            | Arch. Dis. Child.                    | 3.27   |
|            | Clin Perinatol                       | 3.23   |
|            | Semin. Perinatol.                    | 3.19   |
| Psychiatry | World Psychiatry                     | 26.56  |
|            | JAMA Psychiatry                      | 15.31  |
|            | Am J Psychiatry                      | 14.18  |
|            | Mol. Psychiatry                      | 13.20  |
|            | Lancet Psychiatry                    | 11.59  |
|            | Biol. Psychiatry                     | 11.41  |
|            | Psychother Psychosom                 | 8.96   |
|            | Schizophr Bull                       | 7.58   |
|            | J. Neurol. Neurosurg. Psychiatry     | 7.35   |

|                                          |                                    |       |
|------------------------------------------|------------------------------------|-------|
|                                          | Acta Psychiatr Scand               | 6.79  |
|                                          | Neuropsychopharmacology            | 6.40  |
|                                          | J Am Acad Child Adolesc Psychiatry | 6.44  |
|                                          | Br J Psychiatry                    | 6.35  |
|                                          | J Child Psychol Psychiatry         | 6.23  |
|                                          | Addiction                          | 5.79  |
| Radiology, Nuclear Medicine, and Imaging | JACC Cardiovasc Imaging            | 10.19 |
|                                          | Radiology                          | 7.30  |
|                                          | Eur. J. Nucl. Med. Mol. Imaging    | 7.28  |
|                                          | Circ Cardiovasc Imaging            | 6.80  |
|                                          | J. Nucl. Med.                      | 6.65  |
|                                          | Neuroimage                         | 5.84  |
|                                          | J Cardiovasc Magn Reson            | 5.60  |
|                                          | Semin Radiat Oncol                 | 5.36  |
|                                          | Invest Radiol                      | 5.20  |
|                                          | Int. J. Radiat. Oncol. Biol. Phys. | 5.13  |
|                                          | Ultrasound Obstet Gynecol          | 4.71  |
|                                          | Clin Nucl Med                      | 4.56  |
|                                          | Hum Brain Mapp                     | 4.53  |
|                                          | Radiother Oncol                    | 4.33  |
|                                          | Med Image Anal                     | 4.19  |

1 **Supplemental Methods:**  
2

3 The RISmed package (version 2.1.7) in R (version 3.5.1) was used to compile a list of articles published in each  
4 journal during the time period of interest. Original research articles were identified by limiting the article type to  
5 journal articles and excluding comments, editorials, review articles, retracted articles, and erratums. Biographies,  
6 personal narratives, portraits, introductory journal articles, practice guidelines, consensus development conferences,  
7 congresses, clinical conferences, addresses, guidelines, duplicate publications, legal cases, interviews, and news  
8 articles were also excluded.  
9

10 For each article, authors were identified using the EasyPubMed package (version 2.5). This package searched  
11 PubMed for the PMID and returned the extensible markup language (XML) code for the article. The first name, last  
12 name, and initials for each author were extracted from the XML file. Consortium collaborators and investigators  
13 listed in PubMed were excluded.  
14

15 To identify the gender of each author, the Genderize.io application programming interface (API) for R was used  
16 (version 2.0.0). This API was used to predict a gender and the probability of gender for an author's first name. A  
17 gender was only assigned to an author if the program predicted the gender at a probability greater than 60%, a  
18 threshold that has been used in prior work using this API.<sup>1</sup> Genderize.io has previously been shown to be highly  
19 reliable, outperforming methods of gender assignment solely based on the social security administration records and  
20 the US Census.<sup>2</sup> Genderize.io contained 216,286 distinct names from 79 different countries at the time of the  
21 analysis. The gender for 77.5% of authors was predicted at a probability of 60% or greater. Percentages were  
22 calculated based on the total number of authors for whom a gender was identified with >60% confidence.  
23

24 In sensitivity analysis, there was a small but significant decrease in the percentage of authors whose gender could  
25 not be identified over time ( $p<.001$ ) and with increasing impact factor ( $p<.001$ ). In other words, there was a decrease  
26 in the percentage of unclassified authors by 0.63% every year, and for every one point increase in impact factor,  
27 there was an increase in the percentage of authors with a gender identified by 0.16%. However, the percentage of  
28 uncategorized authors was not significantly correlated with proportion of women authors in any category (i.e.,  
29 percentage of first, last, and overall authors) ( $p=0.57$ ;  $p=0.97$ ;  $p=0.85$ , respectively).  
30

31 Our analysis of time to transition to senior authorship was performed in the following manner. We linked  
32 individuals by matching first and last name (excluding middle initials, which may not be consistently included) and  
33 examined time to incident senior authorship among all those authors with a gender identified who published in 2008  
34 as a non-senior author.  
35

36 All analyses utilized R (version 3.5.1), with nominal  $p<0.05$  considered the threshold for statistical significance.
